# Supplementary material for: Ultrasonication-assisted synthesis of CsPbBr3 and Cs4PbBr6 perovskite nanocrystals and their reversible transformation
Source: publisher site journal article supplement (doi:10.3762/bjnano.10.66), 2019-03-06
Supplement: Additional file 1 [file 2190-4286-10-66-S1.pdf]

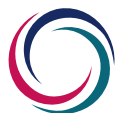

## Supporting Information

for

### **Ultrasonication-assisted synthesis of CsPbBr<sub>3</sub> and Cs<sub>4</sub>PbBr<sub>6</sub> perovskite nanocrystals and their reversible transformation**

Longshi Rao, Xinrui Ding, Xuwei Du, Guanwei Liang, Yong Tang, Kairui Tang  
and Jin Z. Zhang

*Beilstein J. Nanotechnol.* **2019**, *10*, 666–676. [doi:10.3762/bjnano.10.66](https://doi.org/10.3762/bjnano.10.66)

### **Additional PL spectra, SEM image, and UV–vis absorption spectra**

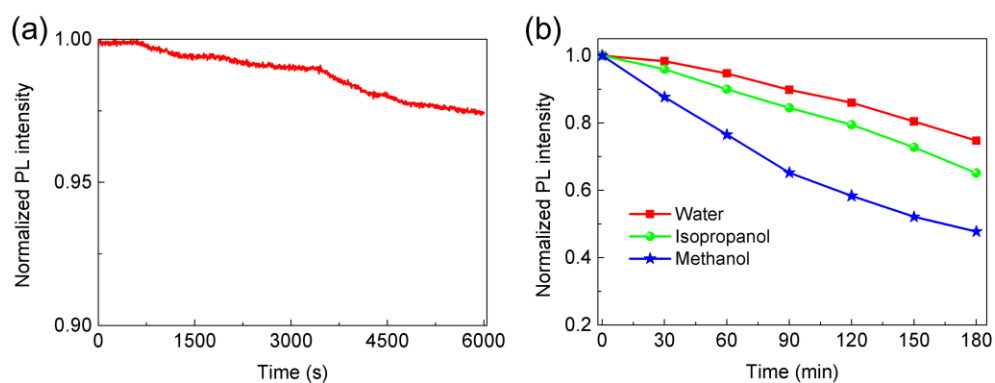

**Figure S1:** (a) Photostability of CsPbBr<sub>3</sub> NCs under a 365 nm UV continuous excitation. (b) The stability of CsPbBr<sub>3</sub> NCs with addition of water, isopropanol, and methanol, respectively.

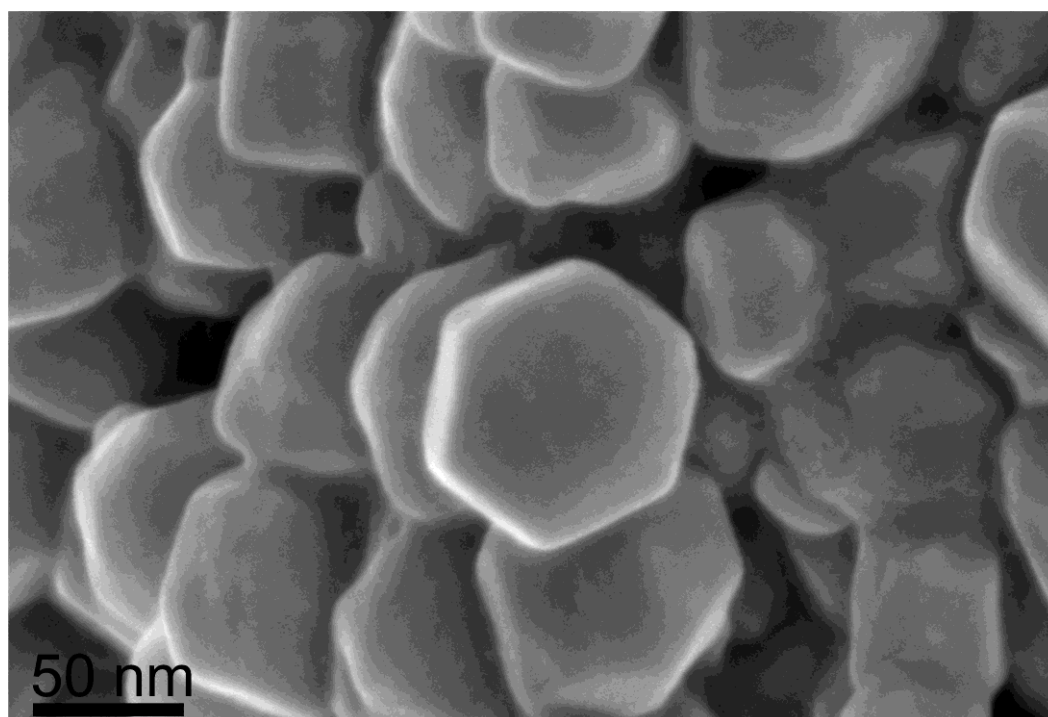

**Figure S2:** SEM image of Cs<sub>4</sub>PbBr<sub>6</sub> NCs.

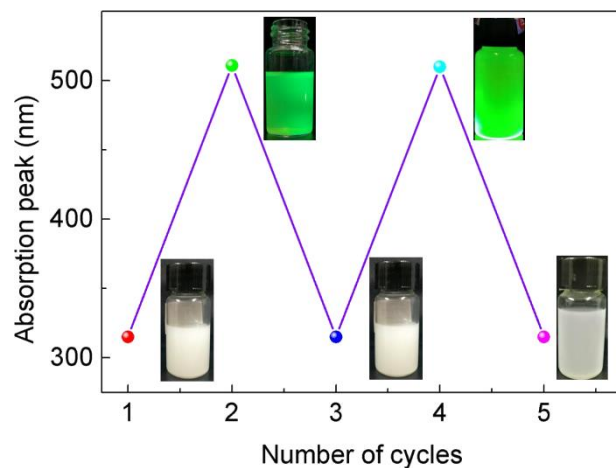

**Figure S3:** Conversion from  $\text{CsPbBr}_3$  PNCs to  $\text{Cs}_4\text{PbBr}_6$  PNCs. The first characteristic absorption peak of the products was recorded.
